# Supplementary material for: High-pressure transformations of CaC2O5– a full structural trend from double [CO3] triangles through the isolated group of [CO4] tetrahedra to framework and layered structures
Source: Royal Society of Chemistry journal article supplement (doi:10.1039/d2cp01748b), 2022-01-01
Supplement: d2cp01748b1.pdf [file d2cp01748b1.pdf]

## Supporting information

High-pressure transformations of  $\text{CaC}_2\text{O}_5$  – the full structural trend from double  $[\text{CO}_3]$  triangles through the isolated group of  $[\text{CO}_4]$  tetrahedra to framework and layered structure

Dinara N. Sagatova <sup>\*1,2</sup>, Pavel N. Gavryushkin<sup>1,2</sup>, Nursultan E. Sagatov<sup>1,2</sup>, and Maksim V. Banaev<sup>1,2</sup>

<sup>1</sup>*Sobolev Institute of Geology and Mineralogy, Siberian Branch of the Russian Academy of Sciences, Novosibirsk 630090, Russian Federation*

<sup>2</sup>*Novosibirsk State University, Novosibirsk 630090, Russian Federation*

---

\*Electronic address:sagatovadn@igm.nsc.ru; Corresponding author

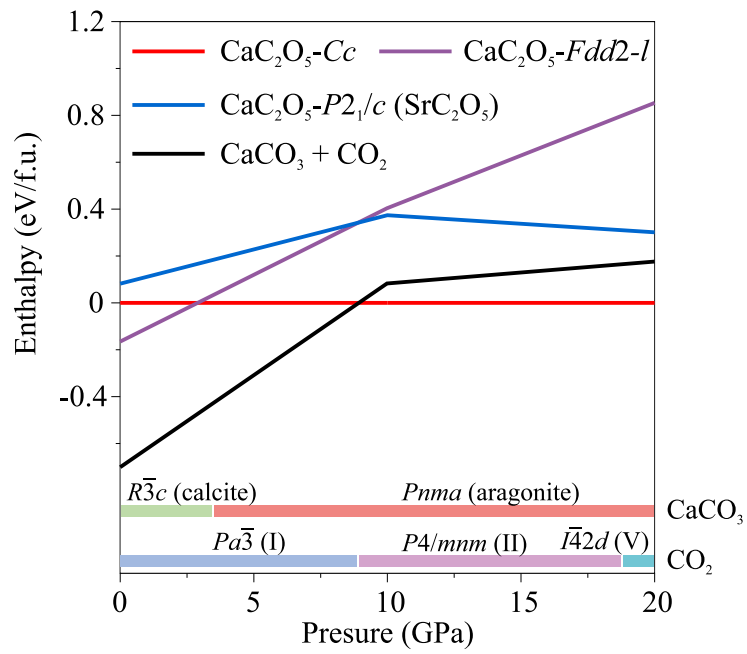

Figure S1: Enthalpy-pressure dependence for the structures of  $\text{CaC}_2\text{O}_5$  and  $(\text{CaCO}_3 + \text{CO}_2)$  mixture.

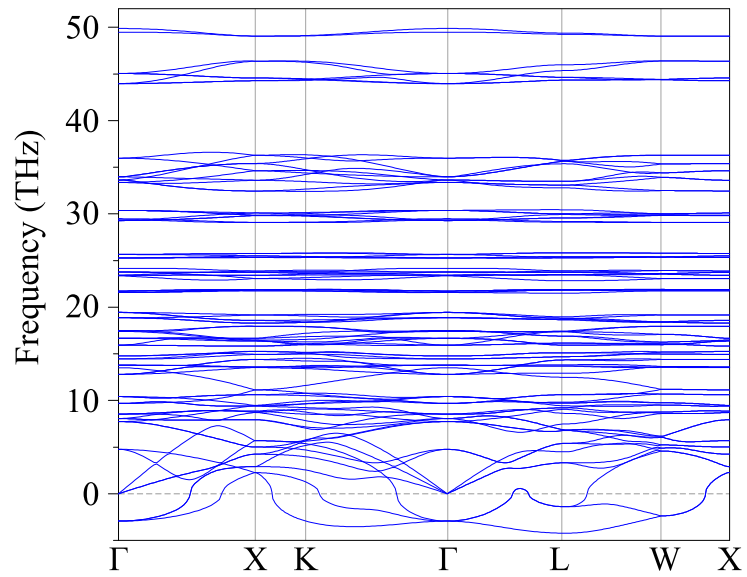

Figure S2: Phonon dispersion curves of the predicted  $\text{CaC}_2\text{O}_5\text{-Fd}\bar{3}m$  at 25 GPa and 0 K.

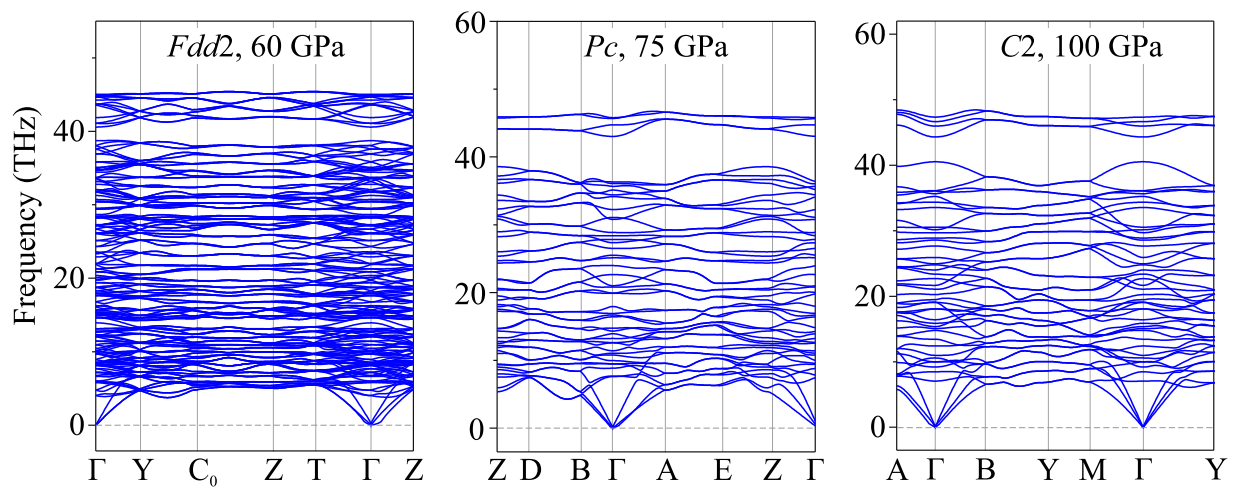

Figure S3: Phonon dispersion curves of the previously predicted structures  $\text{CaC}_2\text{O}_5$ -*Fdd2*, *Pc*, and *C2*.

Table S1:  $\text{CaC}_2\text{O}_5$  structures introduced in the current study.

| Space group        | Pressure (GPa) | Lattice parameters ( $\text{\AA}$ , deg) |                                  |                                  | Atom | Coordinates |       |        |
|--------------------|----------------|------------------------------------------|----------------------------------|----------------------------------|------|-------------|-------|--------|
|                    |                |                                          |                                  |                                  |      | x           | y     | z      |
| <i>Cc</i> (#9)     | 15             | $a = 7.435$<br>$\alpha = 90.00$          | $b = 10.421$<br>$\beta = 121.19$ | $c = 4.589$<br>$\gamma = 90.00$  | Ca1  | 0.249       | 0.144 | -0.052 |
|                    |                |                                          |                                  |                                  | C1   | 0.616       | 0.117 | 0.757  |
|                    |                |                                          |                                  |                                  | C2   | -0.035      | 0.114 | 0.233  |
|                    |                |                                          |                                  |                                  | O1   | 0.151       | 0.075 | 0.346  |
|                    |                |                                          |                                  |                                  | O2   | 0.544       | 0.188 | 0.497  |
|                    |                |                                          |                                  |                                  | O3   | 0.410       | 0.325 | -0.088 |
|                    |                |                                          |                                  |                                  | O4   | 0.031       | 0.426 | 0.407  |
|                    |                |                                          |                                  |                                  | O5   | 0.331       | 0.411 | 0.398  |
| <i>I42d</i> (#122) | 50             | $a = 7.165$<br>$\alpha = 90.00$          | $b = 7.165$<br>$\beta = 90.00$   | $c = 10.148$<br>$\gamma = 90.00$ | Ca1  | 0.533       | 0.250 | 0.125  |
|                    |                |                                          |                                  |                                  | C1   | -0.014      | 0.336 | 0.332  |
|                    |                |                                          |                                  |                                  | O1   | 0.149       | 0.329 | 0.252  |
|                    |                |                                          |                                  |                                  | O2   | -0.023      | 0.189 | 0.405  |
|                    |                |                                          |                                  |                                  | O3   | 0.000       | 0.000 | 0.839  |
| <i>C2-1</i> (#5)   | 50             | $a = 12.019$<br>$\alpha = 90.00$         | $b = 6.936$<br>$\beta = 125.25$  | $c = 6.936$<br>$\gamma = 90.00$  | Ca1  | 0.750       | 0.378 | 0.039  |
|                    |                |                                          |                                  |                                  | Ca2  | 0.000       | 0.667 | 0.500  |
|                    |                |                                          |                                  |                                  | Ca3  | 0.000       | 0.588 | 0.000  |
|                    |                |                                          |                                  |                                  | C1   | -0.041      | 0.294 | 0.692  |
|                    |                |                                          |                                  |                                  | C2   | 0.791       | 0.111 | 0.375  |
|                    |                |                                          |                                  |                                  | C3   | 0.209       | 0.144 | 0.292  |
|                    |                |                                          |                                  |                                  | C4   | 0.541       | 0.461 | 0.275  |
|                    |                |                                          |                                  |                                  | O1   | -0.039      | 0.128 | 0.210  |
|                    |                |                                          |                                  |                                  | O2   | 0.289       | 0.128 | 0.540  |
|                    |                |                                          |                                  |                                  | O3   | 0.377       | 0.453 | 0.476  |
|                    |                |                                          |                                  |                                  | O4   | 0.877       | 0.302 | 0.778  |
|                    |                |                                          |                                  |                                  | O5   | 0.128       | 0.279 | 0.552  |
|                    |                |                                          |                                  |                                  | O6   | 0.628       | 0.477 | 0.203  |
| O7                 | 0.032          | 0.445                                    | 0.754                            |                                  |      |             |       |        |
| O8                 | 0.718          | 0.099                                    | 0.150                            |                                  |      |             |       |        |
| O9                 | 0.282          | 0.156                                    | 0.214                            |                                  |      |             |       |        |
| O10                | 0.468          | 0.310                                    | 0.190                            |                                  |      |             |       |        |
| <i>Fd3m</i> (#227) | 50             | $a = 10.146$<br>$\alpha = 90.00$         | $b = 10.146$<br>$\beta = 90.00$  | $c = 10.146$<br>$\gamma = 90.00$ | Ca1  | 0.500       | 0.500 | 0.500  |
|                    |                |                                          |                                  |                                  | C1   | 0.207       | 0.207 | 0.207  |
|                    |                |                                          |                                  |                                  | O1   | -0.035      | 0.125 | 0.125  |
|                    |                |                                          |                                  |                                  | O2   | 0.280       | 0.280 | 0.280  |

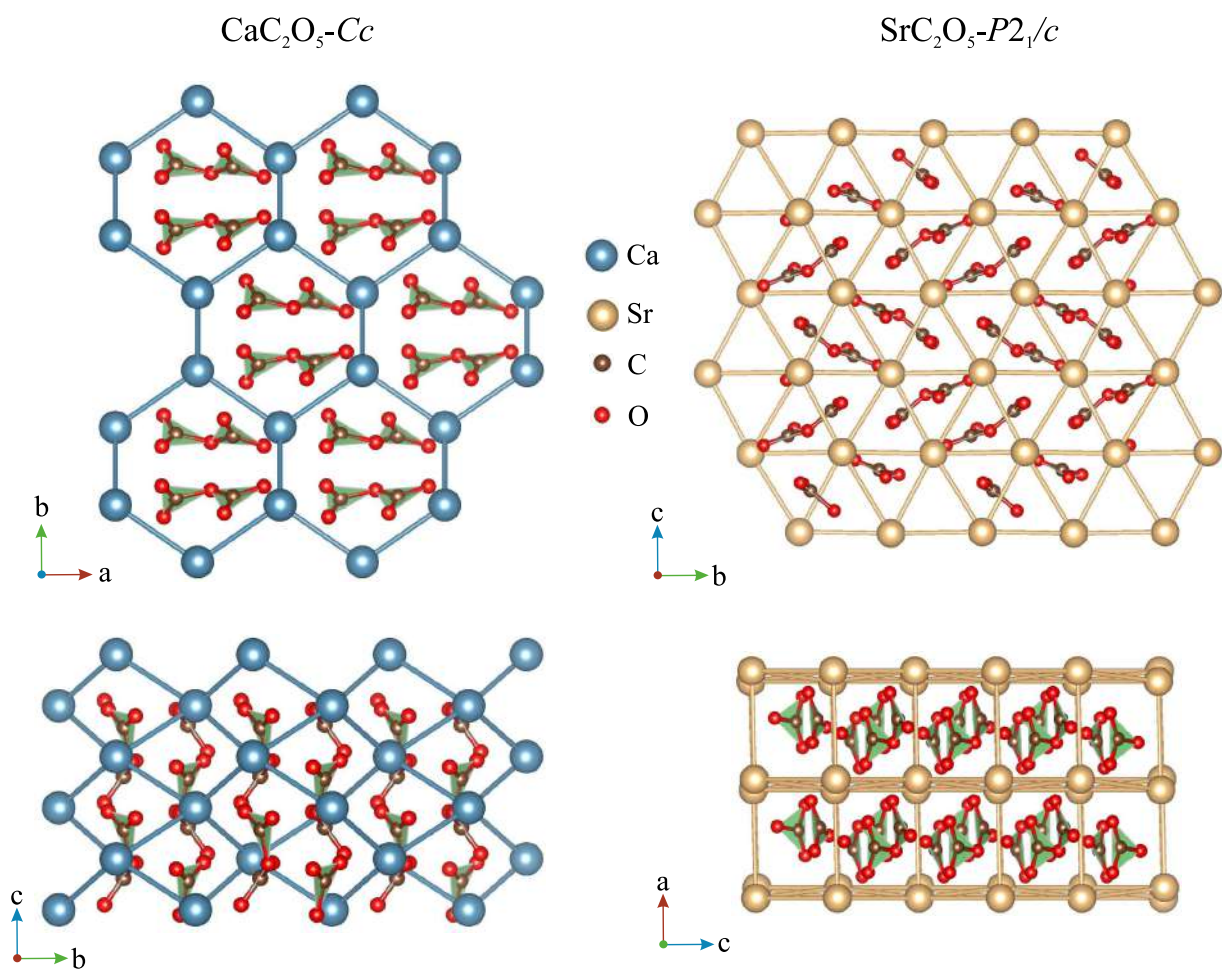

Figure S4: Comparison of Ca- and Sr-pyrocarbonate structures at 15 GPa.

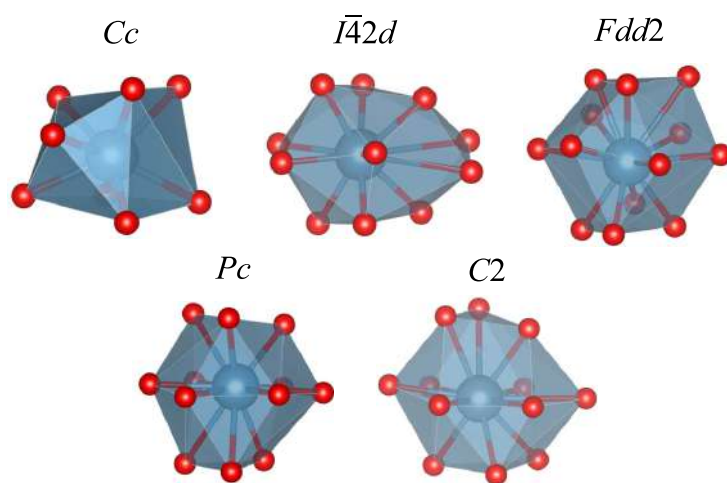

Figure S5: Comparison of Ca-polyhedra of  $\text{CaC}_2\text{O}_5$  modifications.

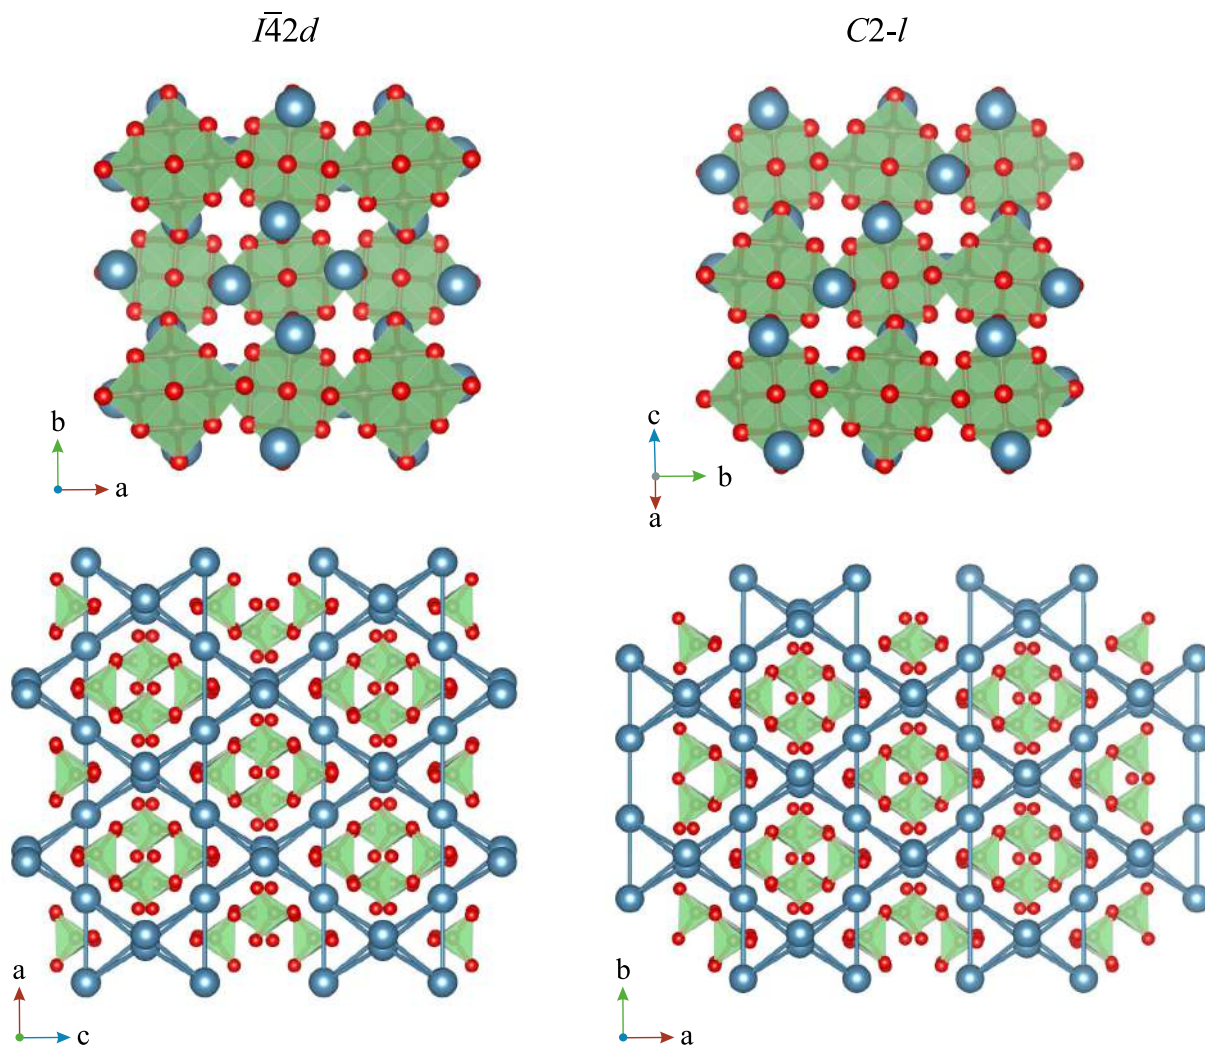

Figure S6: Comparison of  $\bar{I}42d$  and  $C2-1$  structures at 25 GPa.

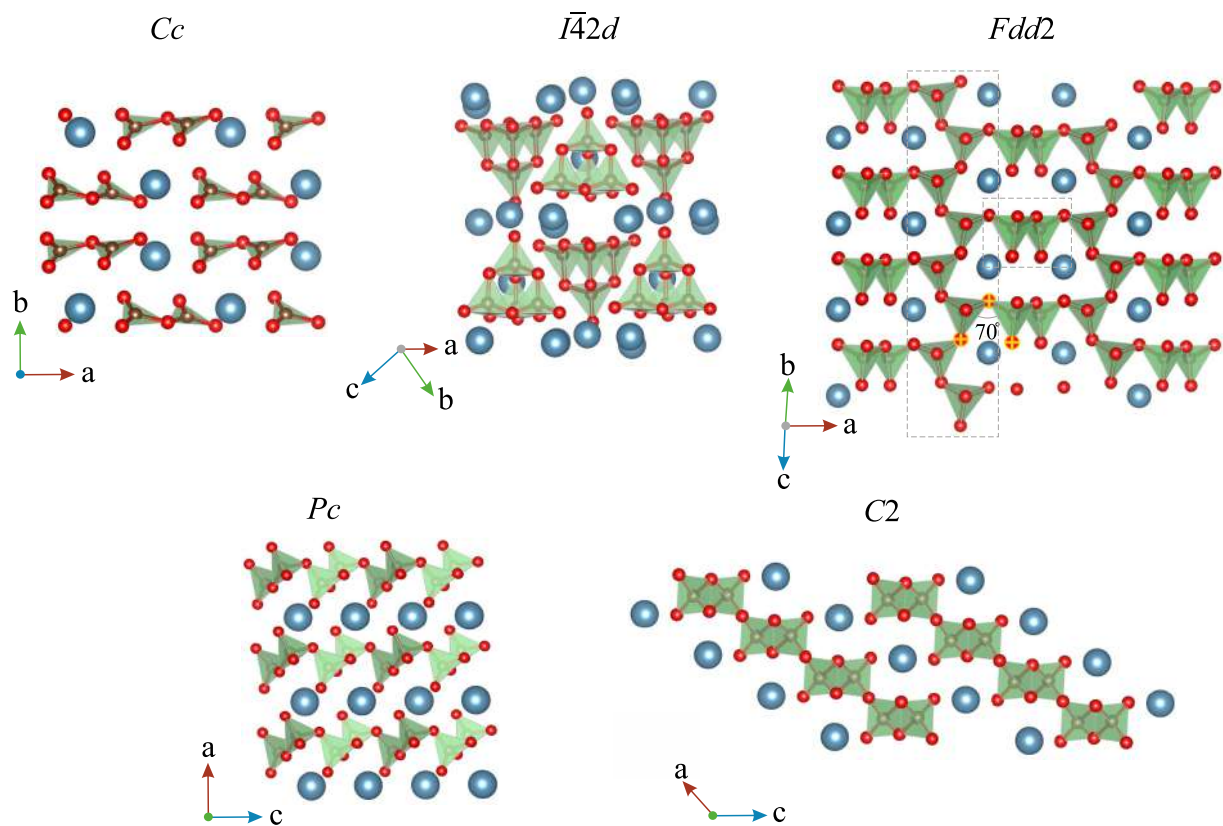

Figure S7: Crystal structure of the  $\text{CaC}_2\text{O}_5$  polymorphic modifications.

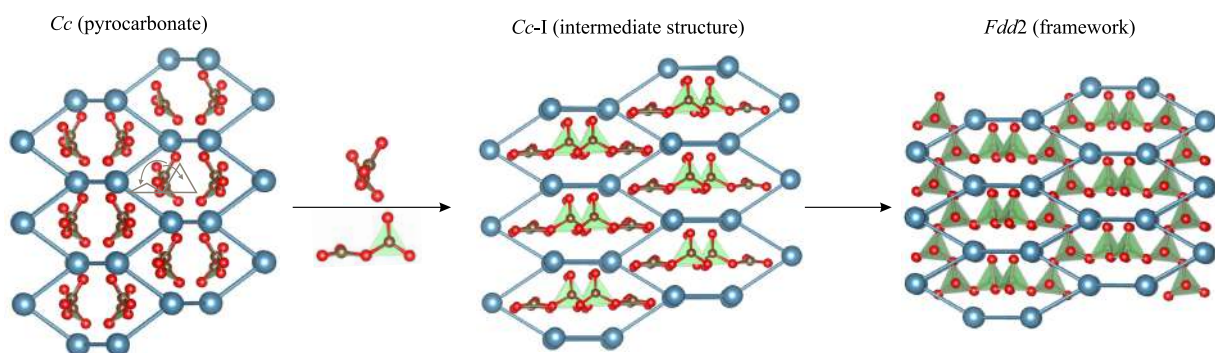

Figure S8: Transformation mechanism of reconstruction of pyrocarbonate  $\text{CaC}_2\text{O}_5$ -*Cc* into a framework carbonate  $\text{CaC}_2\text{O}_5$ -*Fdd2*.

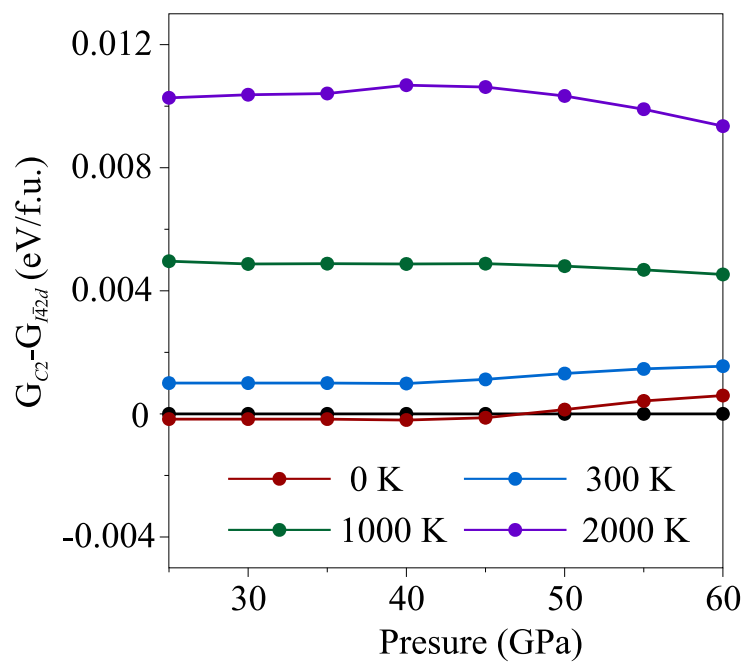

Figure S9: Relative difference between the Gibbs free energies of structures  $\text{CaC}_2\text{O}_5\text{-}I\bar{4}2d$  and  $\text{CaC}_2\text{O}_5\text{-}C2\text{-}1$ .

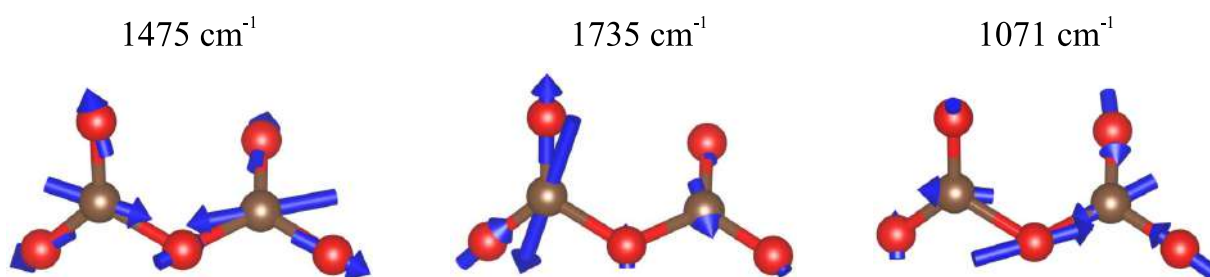

Figure S10: Displacement patterns in Raman modes of  $\text{CaC}_2\text{O}_5\text{-}Cc$  at  $1475\text{ cm}^{-1}$ ,  $1735\text{ cm}^{-1}$ , and  $1071\text{ cm}^{-1}$  at pressure of 15 GPa.



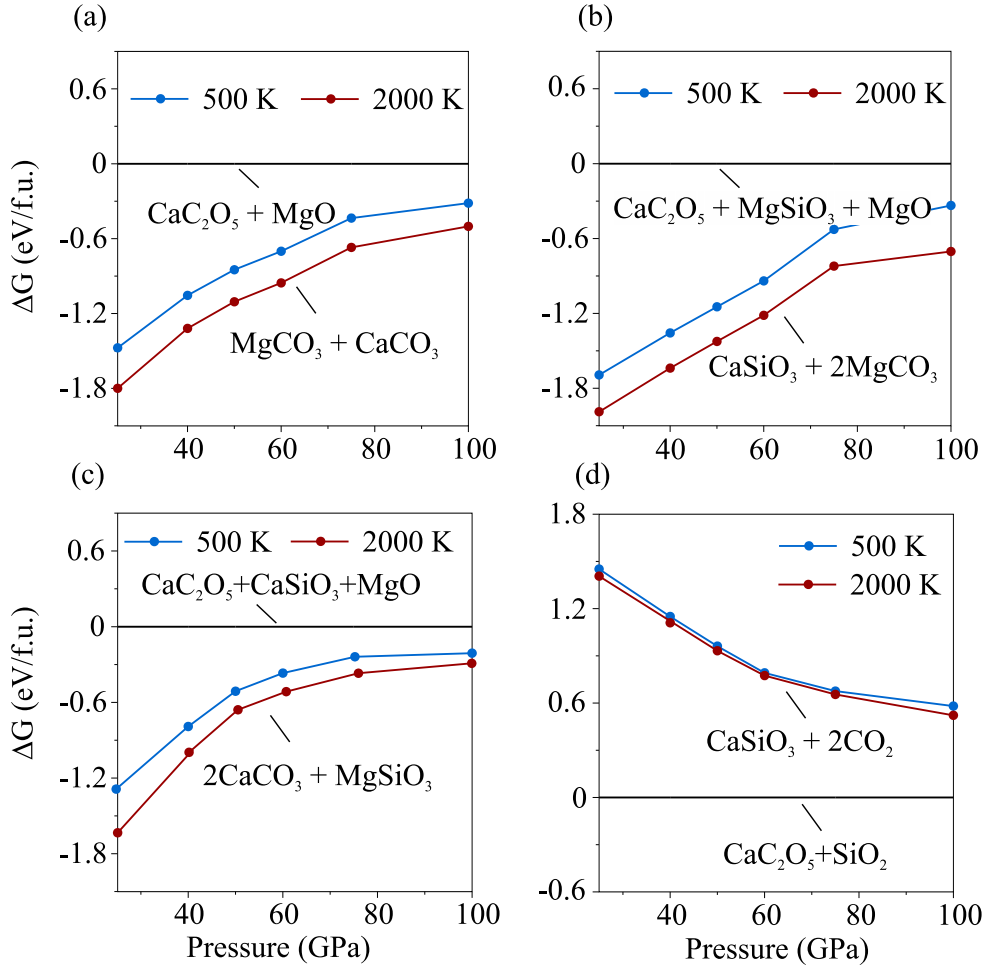

Figure S11: Relative Gibbs free energies as a function of pressure, at several temperatures, for reactions:  $\text{CaC}_2\text{O}_5 + \text{MgO} = \text{MgCO}_3 + \text{CaCO}_3$  (a),  $\text{CaC}_2\text{O}_5 + \text{MgSiO}_3 + \text{MgO} = \text{CaSiO}_3 + 2\text{MgCO}_3$  (b),  $\text{CaC}_2\text{O}_5 + \text{CaSiO}_3 + \text{MgO} = 2\text{CaCO}_3 + \text{MgSiO}_3$  (c), and  $\text{CaC}_2\text{O}_5 + \text{SiO}_2 = \text{CaSiO}_3 + 2\text{CO}_2$  (d).
